# Supplementary material for: Hybrid System for Local Drug Delivery and Magnetic Hyperthermia Based on SPIONs Loaded with Doxorubicin and Epirubicin
Source: PubMed Central journal article supplement (PMC8066659; doi:10.3390/pharmaceutics13040480), 2021-04-01
Supplement: pharmaceutics-13-00480-s001.pdf [file pharmaceutics-13-00480-s001.pdf]

# Supplementary Materials: Hybrid System for Local Drug Delivery and Magnetic Hyperthermia Based on SPIONs Loaded with Doxorubicin and Epirubicin

Dorota Niececka, Joanna Celej, Michał Żuk, Agnieszka Majkowska-Pilip, Kinga Żelechowska-Matysiak, Antoni Lis and Magdalena Osial

Figures present thermograms of samples for which SAR values were measured. Curves were fitted to the typical exponential function (Equation (S1)) described in the literature [1]:

$$\Delta T = a (1 - e^{-bt}) \tag{S1}$$

Parameters **a** and **b** of matched functions are presented in tables 1 and 2. Parameter **a** has interpretation of equilibrium temperature for a time approaching infinity, while parameter **b** determines the rate of approaching temperature.

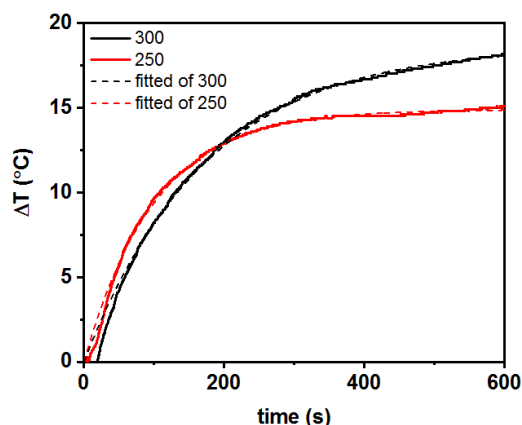

**Figure S1.** SPION@CA\_Epi conjugates measured in buffer solution pH 5.8 with frequency about 488 kHz.

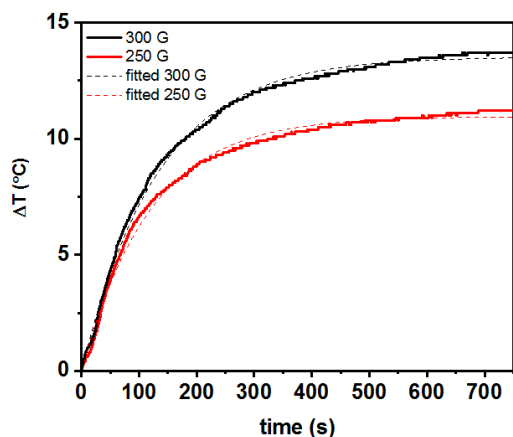

**Figure S2.** SPION@CA\_Epi conjugates measured in serum with frequency about 488 kHz.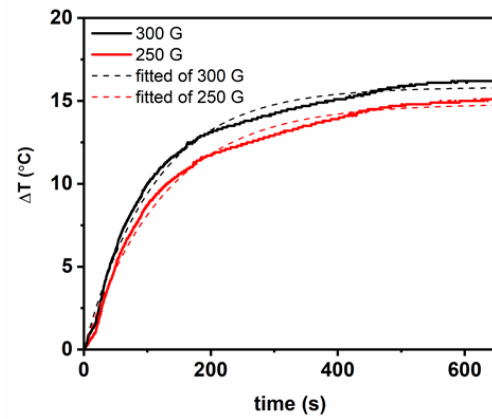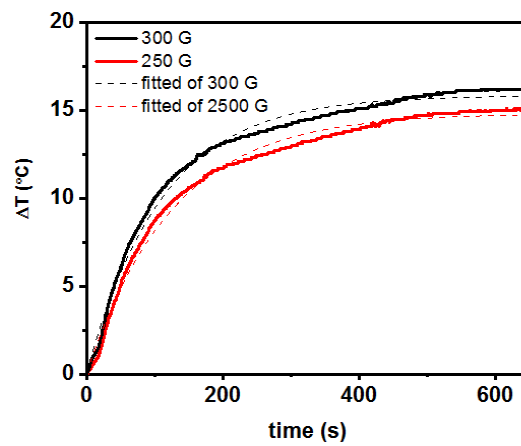**Figure S3.** SPION@CA\_Dox conjugates measured in buffer solution pH 5.8 with frequency about 488 kHz.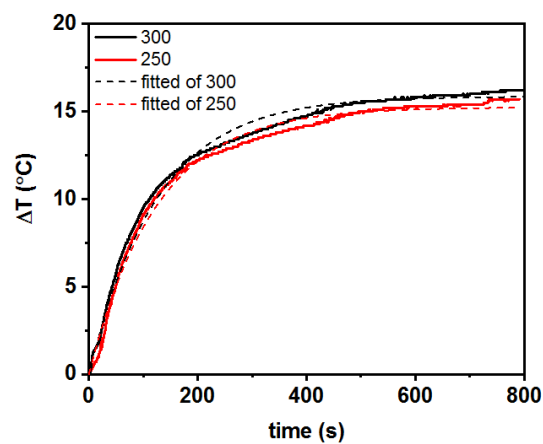**Figure S4.** SPION@CA\_Dox conjugates measured in serum with frequency about 488 kHz.**Table S1.** SPION@CA\_Epi conjugate.

| Solution | Magnetic Field | Par. a   | Par. b  |
|----------|----------------|----------|---------|
| buffer   | 250            | 14.89868 | 0.00994 |
| buffer   | 300            | 18.64557 | 0.00577 |

|       |     |          |         |
|-------|-----|----------|---------|
| serum | 250 | 10.95956 | 0.00838 |
| serum | 300 | 13.52571 | 0.00752 |

**Table S2.** SPION@CA\_Dox conjugate.

| Solution | Magnetic Field | Par. a   | Par. b  |
|----------|----------------|----------|---------|
| buffer   | 250            | 14.82617 | 0.00793 |
| buffer   | 300            | 15.82997 | 0.00902 |
| serum    | 250            | 15.23439 | 0.00802 |
| serum    | 300            | 15.8557  | 0.00801 |

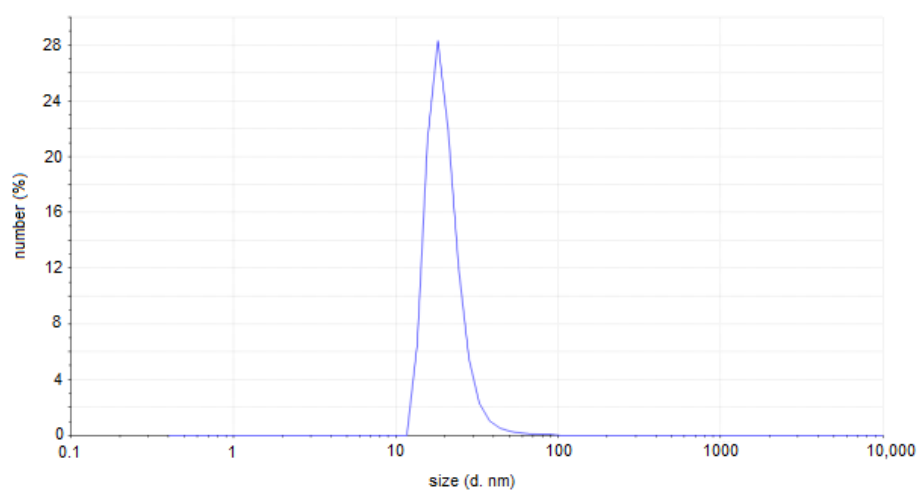

**Figure S5.** Original DLS graph recorded for SPION@CA.

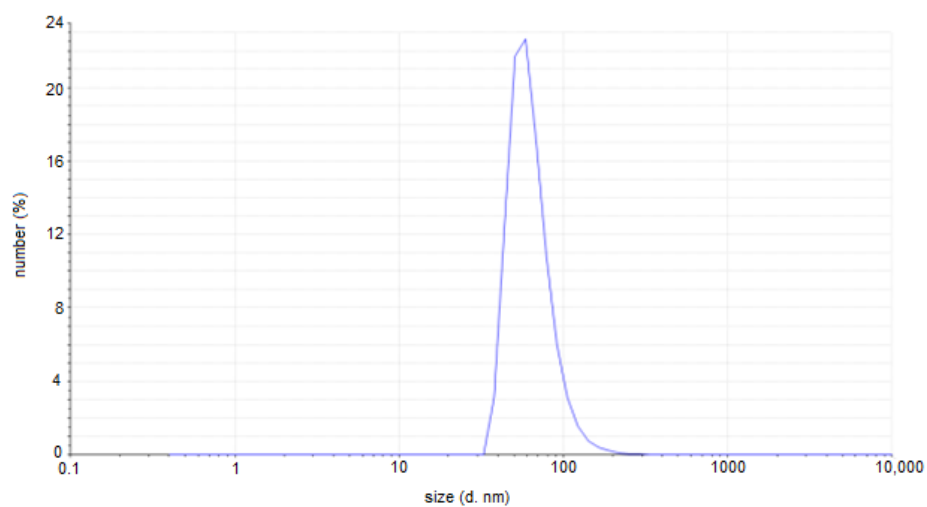

**Figure S6.** Original DLS graph recorded for SPION@CA\_Epi.

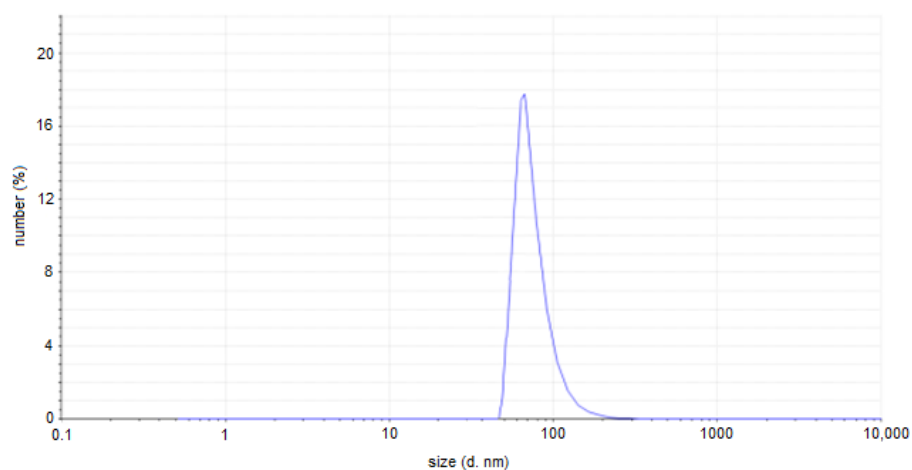

**Figure S7.** Original DLS graph recorded for SPION@CA\_Dox.

## References

1. Ebrahimsadr, S.; Aslibeiki, B.; Asadi, R. Magnetic Hyperthermia Properties of Iron Oxide Nanoparticles: The Effect of Concentration. *Phys. C Supercond. Its Appl.* **2018**, *549*, 119–121, doi:10.1016/j.physc.2018.02.014.
